# Supplementary material
Source: bioRxiv or medRxiv preprint supplement (https://www.biorxiv.org/content/biorxiv/early/2020/01/17/621599/DC1/embed/media-1.pdf)
Supplement: Supplementary file [file media-1.pdf]

## Supplemental Movies

**Supplementary movie 1.** NTA-GFP (green signal) redistributes to filiform apparatus region as ACA9::DsRed labeled pollen tube (magenta signal) approaches.

**Supplementary movie 2.** NTA-GFP (green signal) redistributes to filiform apparatus region during pollen tube reception (GFP channel only, same movie as S1).

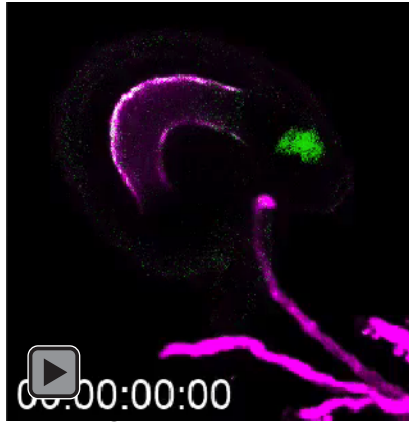

Movie S1

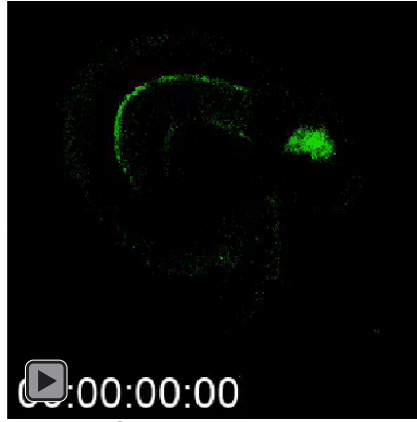

Movie S2

**Supplementary movie 3.** Golgi-mCherry signals (magenta signal) are evenly distributed along the length of the synergid as Lat52::GFP labeled pollen tube (green signal) approaches.

**Supplementary movie 4.** Golgi-mCherry signals (magenta signal) are evenly distributed along the length of the synergid during pollen tube reception (mCherry channel only, same movie as S3).

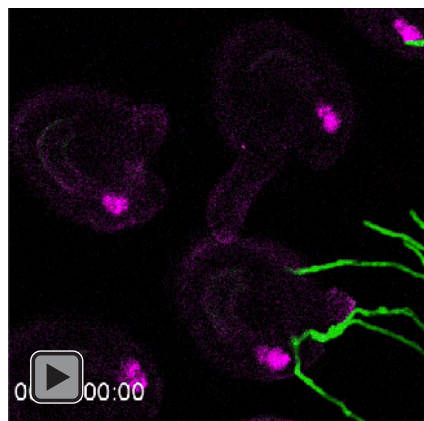

Movie S3

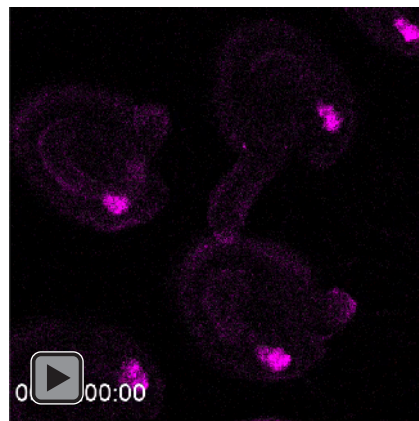

Movie S4

**Supplementary movie 5.** The trans-Golgi marker SYP61-mCherry (magenta signal) is localized toward the micropyle region of synergid cells both before and after pollen tube (green signal) arrival.

**Supplementary movie 6.** The trans-Golgi marker SYP61-mCherry (magenta signal) is localized toward the micropyle region of synergid cells during pollen tube reception (mCherry channel only, same movie as S5).

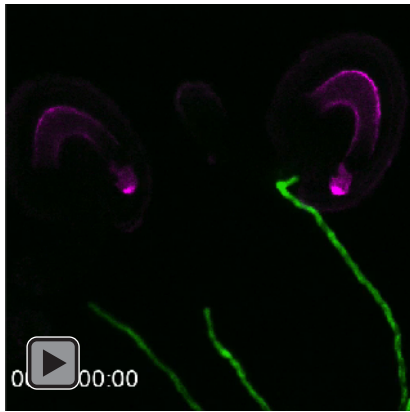

Movie S5

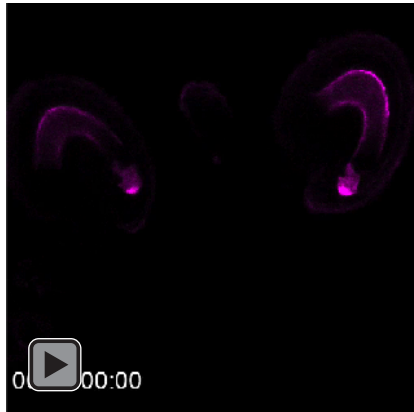

Movie S6

**Supplementary movie 7.** Before and after pollen tube (green signal) arrival, the ER marker SP-mCherry-HDEL (magenta signal) is distributed throughout synergid cells.

**Supplementary movie 8.** The ER marker SP-mCherry-HDEL (magenta signal) is distributed throughout synergid cells (mCherry channel only, same movie as S7).

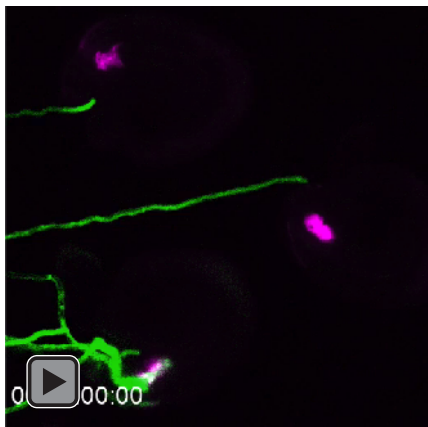

Movie S7

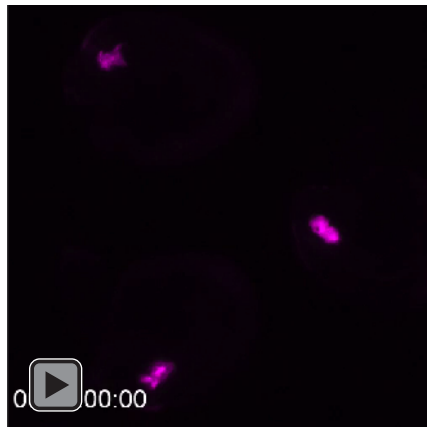

Movie S8

**Supplementary movie 9.** The peroxisome marker mCherry-SLK (magenta signal) does not redistribute to the filiform apparatus region after pollen tube (green signal) arrival.

**Supplementary movie 10.** The peroxisome marker mCherry-SLK (magenta signal) does not redistribute to the filiform apparatus region during pollen tube reception (mCherry channel only, same movie as S9).

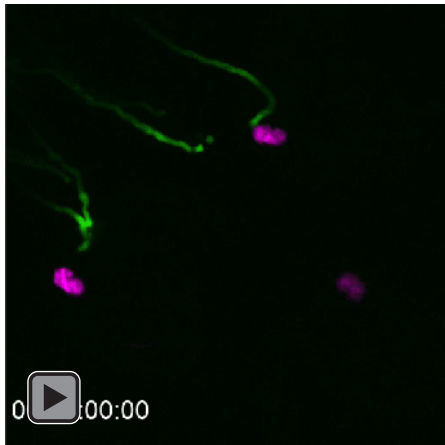

Movie S9

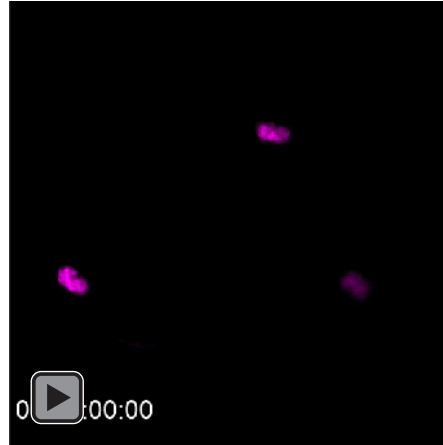

Movie S10

**Supplementary movie 11.** RabA1g-mCherry endosome marker (magenta signal) accumulates at the filiform apparatus region in response to pollen tube (green signal) arrival.

**Supplementary movie 12.** RabA1g-mCherry endosome marker (magenta signal) accumulates at the filiform apparatus region during pollen tube reception (mCherry channel only, same movie as S11).

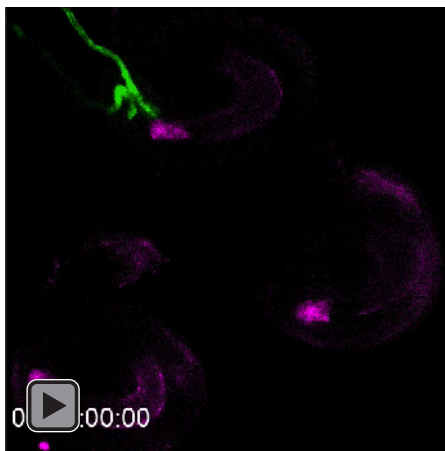

Movie S11

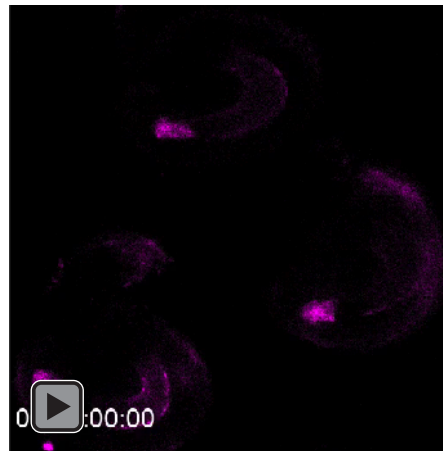

Movie S12
